# Supplementary material
Source: publisher figshare collection journal article supplement (https://acs.figshare.com/ndownloader/files/3817525)
Supplement: Supplementary file 1 [file 3817525]

## SUPPORTING INFORMATION

# **A New “ONE-STEP” Thiol Functionalization Procedure for Ni by Self-Assembled Monolayers**

Claudio Fontanesi<sup>a\*</sup>, Francesco Tassinari<sup>a</sup>, Francesca Parenti<sup>a</sup>, Hagai Cohen<sup>b</sup>, Prakash Chandra Mondal<sup>c</sup>, Vankayala Kiran <sup>c</sup>, Angelo Giglia<sup>d</sup>, Luca Pasquali<sup>d,e,f</sup>, and Ron Naaman<sup>c\*</sup>

<sup>a</sup>DSCG, University of Modena and Reggio Emilia, Via Campi 183, Modena-41125

<sup>b</sup>Department of Chemical Research Support, The Weizmann Institute of Science, Rehovot-76100,  
Israel

<sup>c</sup>Department of Chemical Physics, The Weizmann Institute of Science, Rehovot-76100 Israel

<sup>d</sup>CNR - Istituto Officina dei Materiali, S.S. 14, km 163.5 in Area Science Park, I-34012 Trieste,  
Italy

<sup>e</sup>Dipartimento di Ingegneria “Enzo Ferrari”, Università di Modena e Reggio Emilia, Via Vignolese  
905, Modena-41125, Italy

<sup>f</sup>Department of Physics, University of Johannesburg, PO Box 524, Auckland Park, 2006, South  
Africa

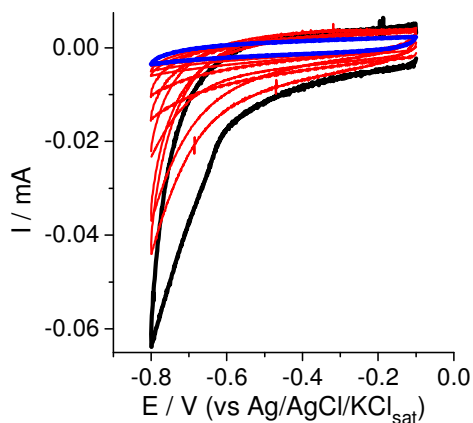

**Figure S1.** Electrochemical deposition of PCT-L polymer on nickel electrode. Current vs voltage graph, 10 subsequent CV cycles ( $E_{\text{ini}} = -0.1$  V,  $E_{\text{inversion}} = -0.8$  V), with a scan rate of  $0.05 \text{ V s}^{-1}$ . Solution composition: 0.5 mM PCT-L containing 0.1 M TBATFB in dry chloroform.

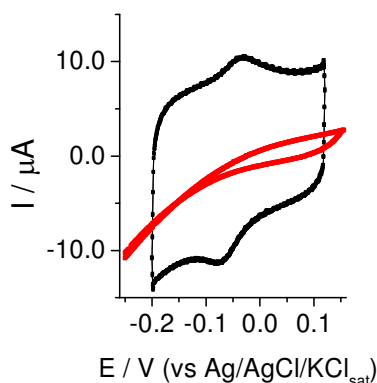

**FigureS2.** Cyclic voltammograms of Ni/L-cysteine/TBO interface (Black line) and Ni/L-cysteine (red line). The voltammograms were recorded in 10 mM phosphate buffer containing 0.1 M KCl water solution, pH =7. The scan rate used was  $0.1 \text{ V s}^{-1}$  for each case.

### Electrochemistry of Au/L-Cysteine/TBO

The hybrid Au/L-Cysteine/TBO CVs, recorded in the -0.35 to 0.25 V potential ranges, show a quasi-reversible pattern in Figure S2. Reduction/oxidation peaks feature a peak-to-peak potential

separation of about 0.18 V at a scan rate of  $0.1 \text{ V s}^{-1}$ , showing a CV pattern analogous to the results obtained using the nickel instead of gold.

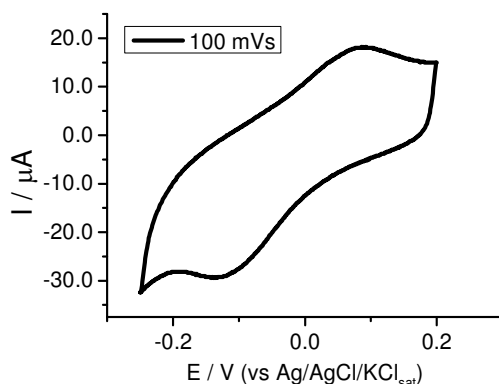

**Figure S3.** CV of the Au/L-cysteine/TBO interface (working electrode), 10 mM phosphate buffer of 0.1 M KCl water solution, pH =7. The scan rate used was  $0.1 \text{ V s}^{-1}$ .

### XPS 1-Hexadecanethiol

Table I SI sets out values of atomic concentrations (%), elemental ratios and film thickness collected in the case of four different samples: two different pristine Ni surfaces (Pristine entry) and two different functionalized Ni surfaces (SAM sample1 and 2). Eventually data are shown for measurements carried out at SAM  $60^\circ$  incident X-ray grazing angle. The first four columns show atomic elemental ratios, Ni(3p)/Ni(2p) is the ratio between the Ni(3p) and Ni(2p) intensities,  $S_{ox}/S$  and represent the ratios in intensities concerning the sulphur in the oxidized/reduced oxidation states,  $O_{inner}/O$  the oxygen signal recorded at  $100 \text{ \AA}$  depth and on the surface, C/S the atomic carbon to sulfur ratio,  $d_C$  the estimated SAM thickness.

| <b>Table I SI. XPS atomic concentrations (%), elemental ratios and film thickness; see text for entry details.</b> |              |          |          |          |                      |                              |                                 |            |                                    |
|--------------------------------------------------------------------------------------------------------------------|--------------|----------|----------|----------|----------------------|------------------------------|---------------------------------|------------|------------------------------------|
|                                                                                                                    | <b>Ni 3p</b> | <b>O</b> | <b>C</b> | <b>S</b> | <b>Ni(3p)/Ni(2p)</b> | <b><math>S_{ox}/S</math></b> | <b><math>O_{inner}/O</math></b> | <b>C/S</b> | <b><math>d_C/\text{\AA}</math></b> |
| <b>Pristine</b>                                                                                                    | 26.0         | 29.5     | 22.9     |          | 1.203                |                              | 0.195                           |            | 11.4                               |
|                                                                                                                    |              |          |          |          |                      |                              |                                 |            |                                    |
| <b>SAM sample 1</b>                                                                                                | 27.6         | 7.2      | 46.4     | 3.9      | 1.843                | 0.36                         | 0.09                            | 11.9       | 26.0                               |
| <b>SAM sample 2</b>                                                                                                | 29.2         | 6.6      | 44.5     | 3.8      | 1.840                | 0.39                         | 0.073                           | 11.9       | 24.8                               |
| <b>SAM <math>60^\circ</math> grazing angle</b>                                                                     | 23.4         | 8.65     | 50.1     | 4.0      | 1.679                | 0.22                         | 0.06                            | 12.6       | 14.4                               |

## POLYMER CHARACTERIZATION<sup>1</sup>

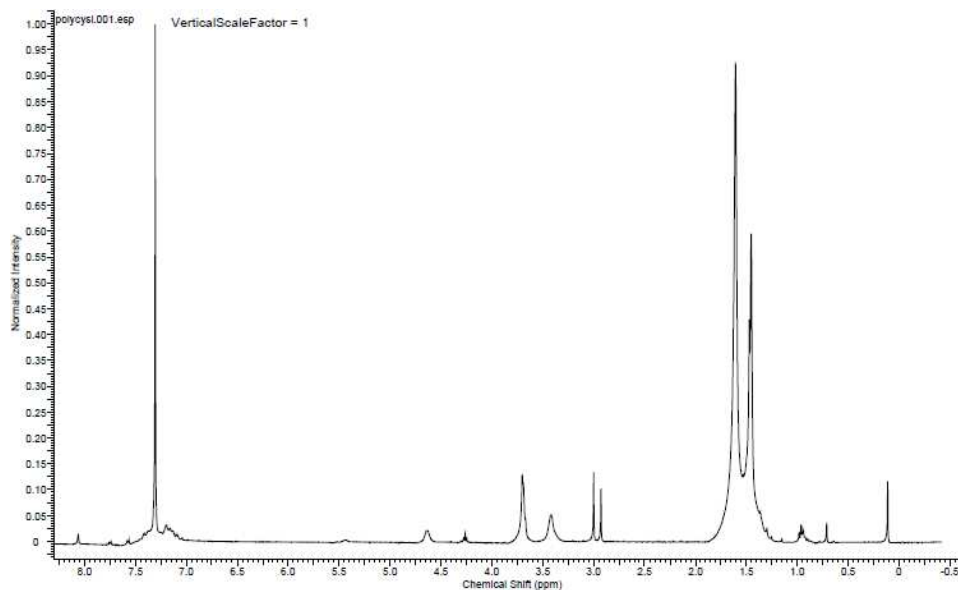

**Figure S4.** <sup>1</sup>H-NMR spectrum of the PCT-L in CDCl<sub>3</sub> (400 MHz).

### GPC

GPC was carried out on a Hewlett–Packard system equipped with a Hewlett–Packard 5m mixed PL gel column and a diode-array UV detector, using THF as the eluent, with a flow rate of 1.0 mL min<sup>-1</sup>, at room temperature. The GPC system was calibrated using a series of monodisperse polystyrene standards. The GPC data of PCT-L (Figure S5) shows two major peaks, one with molecular weight (M<sub>w</sub>)=24036 and polydispersity index (PDI) = 1.15 and the other with M<sub>w</sub> = 4683 and PDI = 1.5.

The first peak of the GPC is attributed to an interchain aggregated form of the polymer, while the second peak is attributed to the free standing chain.

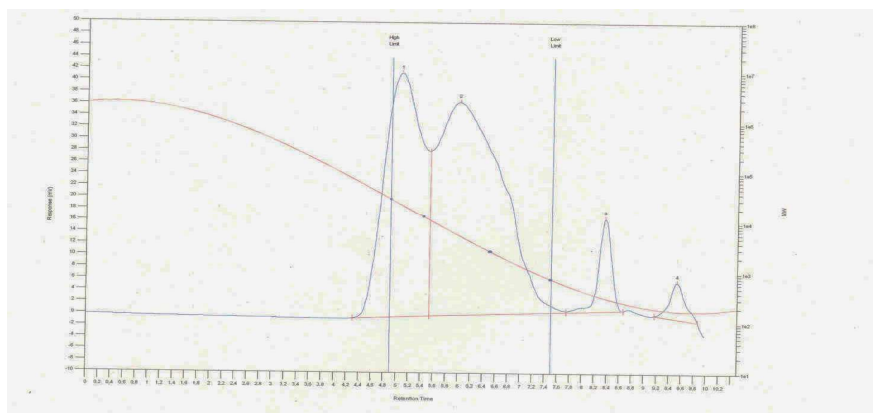

**Figure S5.** GPC monitoring graph PCT-L polymer.

| Sample Injection Report |                 |               |               |                |          |                |         |
|-------------------------|-----------------|---------------|---------------|----------------|----------|----------------|---------|
| MW Averages             |                 |               |               |                |          |                |         |
| Peak No                 | Mp              | Mn            | Mw            | Mz             | Mz+1     | Mv             | PD      |
| 1                       | 23373           | 20833         | 24036         | 27704          | 31503    | 23518          | 1.15375 |
| 2                       | 5782            | 3122          | 4683          | 6312           | 7587     | 4441           | 1.5     |
| 3                       | 321             | 323           | 327           | 331            | 337      | 326            | 1.01238 |
| 4                       | 0               | 0             | 0             | 0              | 0        | 0              | 0       |
| Processed Peaks         |                 |               |               |                |          |                |         |
| Peak No                 | Start RT (mins) | Max RT (mins) | End RT (mins) | Pk Height (mV) | % Height | Area (mV.secs) | % Area  |
| 1                       | 4.30            | 5.07          | 5.53          | 41.727         | 0        | 1802.03        | 100     |
| 2                       | 5.53            | 6.00          | 7.75          | 36.5427        | 0        | 2666.91        | 100     |
| 3                       | 7.75            | 8.37          | 8.67          | 15.8558        | 0        | 230.943        | 100     |
| 4                       | 9.17            | 9.53          | 9.87          | 6.33069        | 0        | 109.682        | 100     |

## UV-Vis and Circular Dichroism Spectra

The UV-Vis and CD spectra of a PCT-L drop casted film on quartz are shown in Figure S6 and S7 respectively.

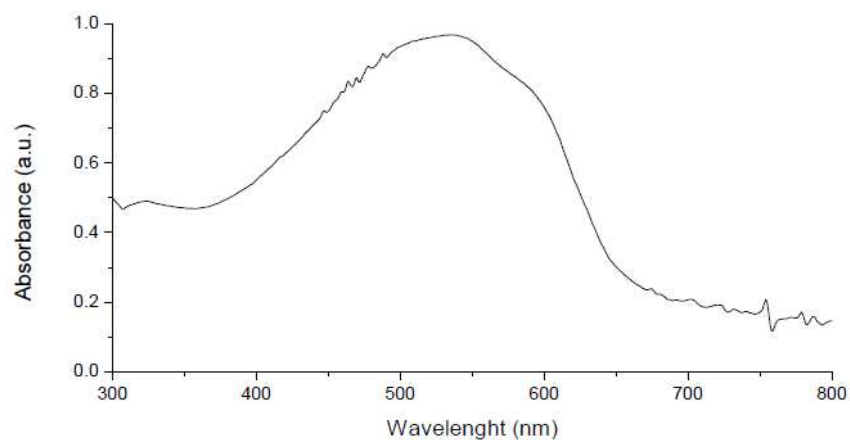

**Figure S6.** UV-Vis spectrum of PCT-L polymer film on quartz.

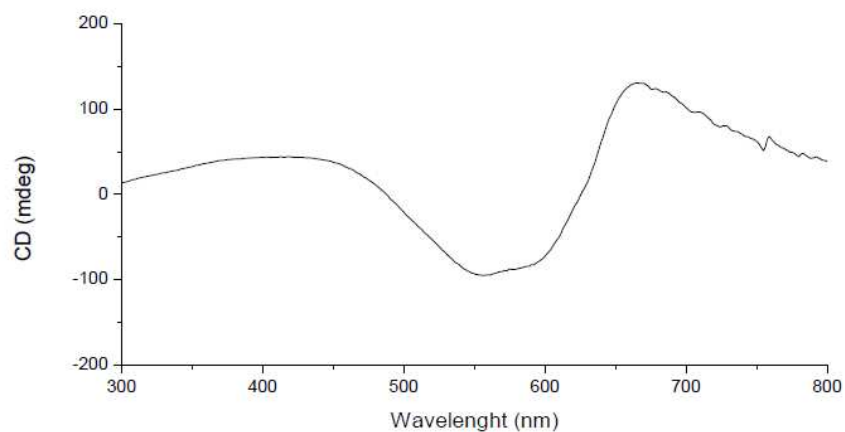

**Figure S7.** CD spectrum of PCT-L polymer film on quartz.

## References

- (1) Cagnoli, R.; Lanzi, M.; Mucci, A.; Parenti, F.; Schenetti, L. Polymerization of Cysteine Functionalized Thiophenes. *Polymer* **2005**, *46*, 3588–3596.
